# Supplementary material for: Decrease of the required dopant concentration for δ-Bi2O3crystal stabilization through thermal quenching during single-step flame spray pyrolysis
Source: Royal Society of Chemistry journal article supplement (doi:10.1039/c5ce02430g), 2016-01-01
Supplement: c5ce02430g1.pdf [file c5ce02430g1.pdf]

## Electronic Supplementary Information

# Decrease of the required dopant concentration for $\delta$ -Bi<sub>2</sub>O<sub>3</sub> crystal stabilization through thermal quenching during single-step flame spray pyrolysis

*Jochen A.H. Dreyer,<sup>a</sup> Suman Pokhrel,<sup>b</sup> Johannes Birkenstock,<sup>c</sup> Miguel G. Hevia,<sup>d</sup> Marco Schowalter,<sup>e</sup> Andreas Rosenauer,<sup>e</sup> Atsushi Urakawa,<sup>d</sup> Wey Yang Teoh<sup>a</sup> and Lutz Mädler<sup>b,\*</sup>*

<sup>a</sup> *Clean Energy and Nanotechnology (CLEAN) Laboratory, School of Energy and Environment, City University of Hong Kong, Hong Kong SAR.*

<sup>b</sup> *Foundation Institute of Materials Science (IWT), Department of Production Engineering, University of Bremen, Germany. E-mail: lmaedler@iwt.uni-bremen.de*

<sup>c</sup> *Central Laboratory for Crystallography and Applied Materials, University of Bremen, Germany.*

<sup>d</sup> *Institute of Chemical Research of Catalonia (ICIQ), Tarragona, Spain.*

<sup>e</sup> *Institute of Solid State Physics, University of Bremen, Germany.*

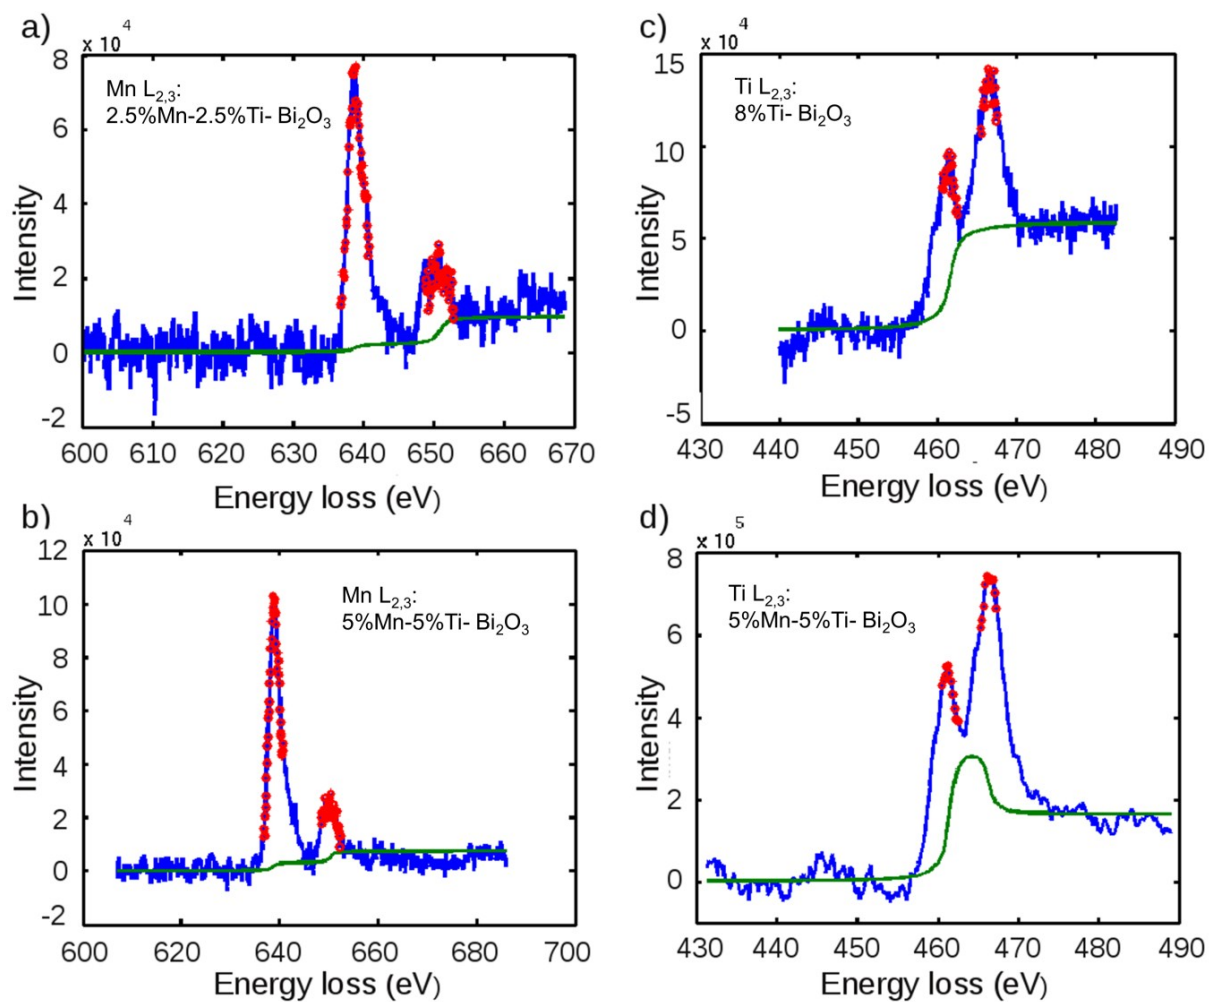

**Fig. S1** EELS spectrum of  $L_{2,3}$  edge of Mn or Ti containing  $\text{Bi}_2\text{O}_3$ . (a) Mn  $L_{2,3}$  edge spectra of 2.5%Mn-2.5%Ti- $\text{Bi}_2\text{O}_3$  (b) Mn  $L_{2,3}$  edge spectra of 5%Mn-5%Ti- $\text{Bi}_2\text{O}_3$  (c) Ti  $L_{2,3}$  edge spectra of 8%Ti- $\text{Bi}_2\text{O}_3$  (d) Ti  $L_{2,3}$  edge spectra of 5%Mn-5%Ti- $\text{Bi}_2\text{O}_3$ . The EELS data confirm the oxidation states of Mn to be +2.

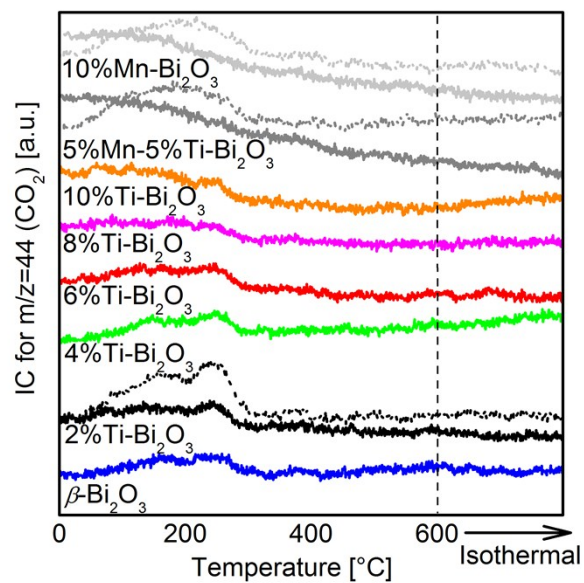

**Fig. S2** Ion current (IC) for  $m/z=44$  ( $\text{CO}_2$ ) during  $\text{H}_2$ -TPRs of the as-prepared samples synthesized by FSP indicate small  $\text{CO}_2$  desorption, which was amplified during  $\text{H}_2$ -TPRs conducted with 50 mg of sample (dotted line).
